## A review of treatment modalities for Middle East Respiratory Syndrome

Yin Mo<sup>1,2</sup> and Dale Fisher<sup>2,3\*</sup>

<sup>1</sup>Ministry of Health Holdings, Singapore; <sup>2</sup>Division of Infectious Diseases, University Medicine Cluster, National University Health System, Singapore; <sup>3</sup>Yong Loo Lin School of Medicine, National University of Singapore, Singapore

\*Corresponding author. E-mail: mdcfda@nus.edu.sg

The Middle East Respiratory Syndrome coronavirus (MERS-CoV) has been a focus of international attention since its identification in 2012. Epidemiologically it is characterized by sporadic community cases, which are amplified by hospital-based outbreaks. Healthcare facilities in 27 countries from most continents have experienced imported cases, with the most significant outbreak involving 186 cases in Korea. The mortality internationally is 36% and guidance for clinical management has yet to be developed. Most facilities and healthcare providers outside of the Middle East receiving patients have no or little experience in the clinical management of MERS. When a case does occur there is likely little time for a critical appraisal of the literature and putative pharmacological options. We identified published literature on the management of both MERS-CoV and the Severe Acute Respiratory Syndrome coronavirus (SARS-CoV) through searches of PubMed and WHO and the US CDC websites up to 30 April 2016. A total of 101 publications were retrieved for critical appraisal. Most published literature on therapeutics for MERS are *in vitro* experiments, animal studies and case reports. Current treatment options for MERS can be categorized as: immunotherapy with virus-specific antibodies in convalescent plasma; polyclonal and monoclonal antibodies produced *in vitro* or in genetically modified animals; and antiviral agents. The use of any therapeutics in MERS-CoV remains investigational. The therapeutic agents with potential benefits and warranting further investigation include convalescent plasma, interferon- $\beta$ /ribavirin combination therapy and lopinavir. Corticosteroids, ribavirin monotherapy and mycophenolic acid likely have toxicities that exceed potential benefits.

### Introduction

Middle East Respiratory Syndrome coronavirus (MERS-CoV) was first isolated from a patient in the Kingdom of Saudi Arabia in June 2012. Most of the approximately 1700 incident cases to date have been managed in the Middle East. However, this disease has been exported to 27 countries in North America, Asia, Europe and Africa. The majority of these were solitary cases that did not cause secondary spread. In June 2015, Korea experienced the largest outbreak outside of Saudi Arabia with an extended chain of transmission involving multiple generations of cases, including 186 patients and 36 deaths (20%).<sup>1</sup> This demonstrated the potential of MERS-CoV in widespread human-to-human transmission, leading to disruption of health and socio-economic systems.

Anti-coronavirus therapy is challenging to develop. Coronaviruses are biologically diverse and rapidly mutating. Hence, effective agents for one strain, especially those that target replicative mechanisms, may be useless in another strain. Animal studies are logistically and technically difficult as the number of animal models available is limited and only found in designated biosafety level 3 laboratories.<sup>2</sup> These challenges result in what we identify as a lack of novel and effective treatment modalities and the paucity of clinical trials. Most of the current treatment options for MERS are extrapolated from the 2003 outbreak of Severe Acute Respiratory Syndrome

coronavirus (SARS-CoV) and the 2009 H1N1 influenza outbreak. A heterogeneous range of treatments is used in MERS patients. For example, in a recent audit<sup>3</sup> involving 51 patients in Saudi Arabia, 42 (82.4%) received broad-spectrum antibiotics; 5 (9.8%) received hydrocortisone; and 31 (61%) received antiviral treatments. The antiviral treatments included: interferon- $\beta$  in 23 (45.1%), interferon- $\alpha$  in 8 (15.7%), and mycophenolate mofetil in 8 (15.7%).

There are fundamental differences between SARS-CoV and MERS-CoV that put in question the basis of applying the evidence from treatment of the former to the latter. Although MERS-CoV is phylogenetically related to the SARS-CoV, there are differences in their biological make-up, pathogenesis and clinical manifestations. In contrast to SARS-CoV, which binds to angiotensin-converting enzyme 2 (ACE-2) receptors, MERS-CoV binds to the receptor dipeptidyl peptidase 4 (DDP4/CD26).<sup>4,5</sup> MERS-CoV *in vivo* targets a wide variety of cells, including type II alveolar cells, non-ciliated epithelial cells (Clara cells) and endothelial cells, but not ACE-2-expressing ciliated epithelial cells infected by SARS-CoV.<sup>6</sup> MERS-CoV, unlike SARS-CoV, can also infect and replicate in human monocyte-derived macrophages.<sup>7</sup> This increases the expression of major histocompatibility complex class I and co-stimulatory molecules leading to a more exaggerated activation of the immune response, including the expression of interleukin-12, interferon- $\gamma$  and chemokines. These differences in receptor usage and susceptibility to type I and type III

interferon may account for the differences in disease patterns, organ tropism and virus shedding.<sup>6,8–10</sup>

Current treatment options for MERS can be categorized into immunotherapy with virus-specific antibodies in convalescent plasma, polyclonal and monoclonal antibodies produced *in vitro* and in genetically modified animals, and antiviral agents. Attempts have also been made at repurposing approved pharmaceutical drugs for MERS-CoV treatment. Multiple compounds, including oestrogen receptor and dopamine receptor antagonists, have displayed activity against both MERS-CoV<sup>11–13</sup> and SARS-CoV<sup>14</sup> in Vero and Huh7 cell models. Considerable data are available, but well-designed clinical trials have yet to be completed because of low case numbers in any one site and the known difficulties of doing trials in outbreak settings.

## Search strategy and selection criteria

References to the publications for this review were identified through searches of PubMed, WHO and the US CDC websites up to 30 April 2016. The search terms used were combinations of ‘treatment’, ‘Middle East respiratory syndrome’, ‘coronavirus respiratory illness’ and ‘Middle East respiratory syndrome coronavirus’. In addition, the reference lists of these articles were also considered. The types of studies included *in vitro*, *in vivo* and clinical studies. As most treatment options for MERS-CoV are extrapolated from SARS-CoV, relevant articles on the treatment of these two coronaviruses were reviewed. The full text of each identified study was retrieved. Articles published in foreign languages were all in Chinese, of which one of the authors is a native speaker.

In total, 101 articles were critically assessed (55 MERS-CoV and 56 SARS-CoV). The featured therapeutics included convalescent plasma, immunoglobulin, monoclonal antibodies, ribavirin, protease inhibitors, interferon, corticosteroids, nitazoxanide, and immunomodulatory agents including cyclosporin, chloroquine and mycophenolic acid and fusion inhibitors.

## Convalescent plasma and immunoglobulins

Convalescent plasma has been used clinically since 1916 to treat infectious diseases.<sup>15,16</sup> Convalescent serum was used during the recent SARS and Ebola outbreaks.<sup>17,18</sup> Any trials undertaken were inadequate in terms of defining the safety and efficacy of this treatment in these diseases. The WHO deemed convalescent plasma as the most promising near-term therapy for MERS in the WHO—International Severe Acute Respiratory and Emerging Infection Consortium MERS-CoV Outbreak Readiness Workshop 2013.<sup>19</sup> However, due to the lack of clinical trials, a WHO position paper published in March 2014 stated that the clinical use of convalescent plasma should be regarded as investigational.<sup>20</sup>

### *In vitro* and animal studies

In MERS-CoV, prophylactic and therapeutic treatment with high-titre MERS immune camel serum was able to diminish weight loss, reduce lung histological changes and accelerate virus clearance in MERS-CoV EMC/2012-infected mice.<sup>21</sup>

Convalescent plasma from SARS patients was shown via indirect immunofluorescence tests to contain cross-reactive antibodies against other  $\beta$ -coronaviruses including MERS-CoV.<sup>22</sup>

However, neutralizing cross-reactivity between SARS-CoV and MERS-CoV has not been demonstrated. These cross-reacting sera are therefore unlikely to be useful therapeutically—an important consideration should MERS affect a country with SARS survivors, such as China, Canada and Singapore.

Novel MERS-CoV-specific poly- and monoclonal antibodies (mAbs)<sup>23–38</sup> are being developed rapidly. They are produced from immunized animals,<sup>27–30</sup> antibody human phage libraries<sup>31–36</sup> and memory B cells of recovered patients.<sup>37,38</sup> Transchromosomal cattle have successfully generated purified human IgG,<sup>27</sup> which rapidly decreased viral lung titres in Ad5-hDPP4 receptor-transduced mice. Monoclonal antibodies targeting the MERS-CoV spike (S) glycoprotein have shown strong neutralizing effects in both *in vitro* and in animal studies. S protein is a surface structural protein critical for virus entry into host cells. In mouse models, transnasal mAb was effective in both prophylactic and post-exposure settings in viral clearance.<sup>28</sup> Similarly in rhesus models, mAb administration resulted in reduced lung pathology by computed-tomography evaluation.<sup>36</sup> However, the caveat in using mAbs is the potential for viral escape and resistance emergence. Their safety profile and *in vivo* effects need to be further explored.

### Clinical data

There are two case reports of using intravenous immunoglobulin (IVIG) to treat MERS.<sup>39,40</sup> One patient from Saudi Arabia was given IVIG together with high-dose corticosteroids for thrombocytopenia.<sup>39</sup> The other was a MERS case imported to the USA. IVIG was given on day 14 of illness.<sup>40</sup> The patient recovered but the IVIG was unlikely to have been effective due to the expected absence of MERS-CoV antibodies in the USA.

A research protocol for collecting and testing convalescent plasma from recovered MERS patients has been formulated and shared in Saudi Arabia,<sup>41</sup> initiating a feasibility and safety study in May 2014.<sup>42</sup> This protocol has promoted the clinical characterization of MERS patients, and the screening of recovered and exposed individuals. Its completion is expected in June 2017. However, the study has been hampered by logistical challenges, local technical capacity and donor supply.<sup>43</sup> A recent communication from the principal investigator of the study revealed that antibody titres in convalescent plasma are too low to produce a therapeutic effect.<sup>38</sup>

There were no randomized controlled studies (RCTs) on the utility of convalescent plasma during the SARS outbreaks. One retrospective and four prospective studies on SARS-affected patients undertaken in China, Hong Kong and Taiwan demonstrated earlier discharge, rapid decrease in viraemia and survival benefits.<sup>18,44–47</sup> Promising outcomes were also observed when delayed administration (median = day 11) of pentaglobin, an IgM-enriched immunoglobulin preparation, led to improved clinical parameters and radiological appearance in 12 severe SARS patients who continued to deteriorate despite corticosteroid and ribavirin therapy.<sup>48</sup> Similarly, during the subsequent 2009 H1N1 outbreak, a prospective cohort study with 93 intensive care patients showed that the use of convalescent plasma was able to reduce respiratory tract viral load, serum cytokine response and mortality.<sup>49</sup> This positive effect on H1N1 patients was further confirmed by a multicentre RCT using hyperimmune IVIG in intensive care patients.<sup>50</sup> Its early administration within 5 days of symptom onset was

associated with a lower viral load and reduced mortality. A systematic review and meta-analysis by the University of Nottingham, which included 32 studies of SARS-CoV infection and severe influenza, concluded that there was a statistically significant reduction in mortality when convalescent plasma was administered early, compared with placebo or no therapy.<sup>51</sup> However, the studies were deemed to be low quality and heterogeneous. They lacked control groups and the effects of convalescent plasma or IVIG could not be discerned from the effects of patient comorbidities, stage of illness or other treatments.

A possible theoretical drawback of convalescent plasma is immunopotentiality of infection by passive immunization. This effect is specific to a limited number of viruses including coronaviruses.<sup>20</sup> Severe hepatitis was reported in immunized ferrets, and was thought to be mediated by antibody enhancement of SARS-CoV infection in the liver.<sup>52</sup> However, this was not reproduced in a monkey model.<sup>53</sup> In this model, SARS-CoV S protein-specific IgG levels in monkey lung tissue were found to be increasing after re-challenge with SARS-CoV, but there was no enhancement in viral replication. Immunopotentiality from the clinical use of convalescent plasma or other immune globulin-related products in the treatment of a coronavirus has not been reported.

Plasma products vary regionally depending on disease epidemiology and may not contain therapeutic levels of antibodies. Public Health England's evaluation on UK IVIG showed that it has no MERS-CoV neutralizing activity.<sup>54</sup> In Saudi Arabia, seropositivity of anti-MERS-CoV was found to be 0%–3.3% amongst healthy volunteers, varying by province, age and exposure to camels from 2010 to 2013.<sup>55–57</sup>

## Interferon

Coronaviruses have been shown to suppress interferon (IFN) response in hosts. A subdued IFN response diminishes antigen presentation and reduces antiviral adaptive Th-1 immune response.<sup>58,59</sup> Therefore, recombinant IFNs or IFN inducers, especially types I and II, have been identified as a treatment modality for MERS for their ability to augment host response.

### *In vitro* and animal studies

Type I ( $\alpha$ ,  $\beta$ ), type II ( $\gamma$ ) and type III ( $\lambda$ ) IFNs exhibit activity against SARS-CoV.<sup>60–66</sup> Of these, IFN- $\beta$  is the most potent when compared with IFN- $\alpha$  and  $\gamma$ .<sup>64–66</sup> MERS-CoV is 50–100 times more sensitive to IFN- $\alpha$  than SARS-CoV in Vero cells.<sup>67</sup> As viruses causing lysis of their target cells are most effectively inhibited by IFNs in uninfected cells, IFNs have their highest utility in prophylaxis or early post-exposure.<sup>68</sup>

IFNs display synergistic characteristics when used in combination in *in vitro* studies. When administered together, IFN- $\beta$  and IFN- $\gamma$  inhibited SARS-CoV plaque formation by 30-fold and replication by 3000-fold.<sup>61,69</sup> The combination of IFN- $\alpha$ 2b and ribavirin was effective in reducing MERS-CoV replication in Vero and LLC-MK2 cells.<sup>70</sup> When combined, there was an 8- and 16-fold decrease in the dose of IFN- $\alpha$ 2b and ribavirin required, respectively. The biological plausibility of the combination was studied via microarray, which showed that ribavirin and IFN- $\alpha$  targeted MERS-CoV genes involved in pathogen recognition, cytokine release and immune responses.<sup>71</sup> The combination was found to be effective in rhesus macaques<sup>72</sup> and common marmoset<sup>73</sup>

models when IFN with ribavirin and/or lopinavir was administered. Treatment led to reduced virus replication, moderated host response and improved clinical outcome.

### Clinical data

IFN alfacon-1 and corticosteroids were studied in an open-label, uncontrolled study in 22 patients diagnosed as having probable SARS.<sup>74</sup> The interferon alfacon-1 and corticosteroids arm had better oxygen saturation, more rapid resolution of radiographic lung abnormalities, and lower levels of creatine kinase compared with the corticosteroid arm. However, there was no standard regimen used and adverse events were not well documented.

In MERS-CoV, the role of IFN- $\alpha$  was highlighted in a study that compared the early immune response in two patients.<sup>75</sup> The first patient, who succumbed rapidly, was found to have significantly lower IFN- $\alpha$  secretion in serum and bronchoscopy lavage samples than the other patient, who survived the infection. The use of IFN- $\alpha$ 2a and ribavirin was described in four case reports<sup>76–79</sup> and five retrospective cohort studies.<sup>80–84</sup> These studies involved mainly critically ill patients requiring mechanical ventilation. The mortality in the five retrospective studies ranged from 50%<sup>80</sup> to 100%,<sup>83</sup> higher than the recognized 36% mortality associated with MERS internationally.<sup>85</sup> The study methods are heterogeneous and the times at which IFN and ribavirin combination treatment was administered are inconsistently described. One of these studies investigated the impact of earlier administration of IFN and ribavirin.<sup>82</sup> This study involved 44 mechanically ventilated patients. Twenty-two were given IFN- $\alpha$ 2a and ribavirin and the median time to therapy administration was 3 days. Compared with those who did not receive IFN- $\alpha$ 2a and ribavirin, the treatment group had an improvement in survival at 14 days (mortality in treatment group 30% versus comparator group 70%,  $P=0.004$ ) but not at 28 days (mortality treatment group 70% versus comparator group 83%,  $P=0.054$ ). Another retrospective study showed that there was no significant difference in outcomes between patients who were given combinations of ribavirin with IFN- $\alpha$ 2a or IFN- $\beta$ 1a.<sup>82</sup> The mortality in patients who received IFN- $\alpha$ 2a was 85% (11/13) compared with 64% (7/11) in those who received IFN- $\beta$ 1a ( $P=0.24$ ).

The effect of IFN- $\beta$  and mycophenolic acid combination therapy was studied in a recent retrospective observational study in Saudi Arabia involving 51 patients.<sup>3</sup> Although the univariate analysis demonstrated improved survival in patients treated with this combination, the multivariate analysis, which considered the severity of illness, showed no association between the treatments and survival.

IFNs are well-established agents and routinely available. They are used in viral hepatitis, malignancies such as leukaemia and renal cell carcinoma, and multiple sclerosis. Shorter-acting preparations should be preferred rather than pegylated-IFNs to achieve fast onset of action as their utility has been suggested as being better in early infection. Inhaled IFN- $\beta$  remains under investigation in Phase 2 trials for patients with asthma.<sup>86</sup>

### Protease inhibitors

Protease inhibitors are well-established antivirals, with a favourable toxicity profile, used in the treatment of HIV. Protease inhibitors prevent viral replication by binding to enzymes responsible for

proteolytic cleavage. Lopinavir is one of the HIV protease inhibitors that has been repurposed for SARS and MERS treatment. It was previously shown to block the SARS-CoV main protease, M<sup>pro</sup>.<sup>87</sup>

### **In vitro and animal studies**

Lopinavir was found to be inhibitory against MERS-CoV, *in vitro* in Vero E6 and in Huh7 cells, at a mean 50% effective concentration (EC<sub>50</sub>) of 8.0 µM in a screen of 348 FDA-approved drugs for anti-MERS-CoV activity.<sup>11</sup> This lopinavir plasma concentration is similar to that observed in patients with HIV.<sup>88</sup> Atazanavir and ritonavir were found to be inactive in the same screen.<sup>11</sup> In a common marmoset model, lopinavir/ritonavir was as effective as IFN-β1b in bringing about improved clinical, radiological and pathological findings in lung tissues, and lower mean viral loads in lung and kidney tissues when compared with untreated animals.<sup>73</sup>

### **Clinical data**

Observational studies on patients affected by SARS suggested a reduction in mortality and less progression to acute respiratory distress syndrome (ARDS) when lopinavir/ritonavir was combined with ribavirin.<sup>89,90</sup> Patients who received ribavirin, lopinavir/ritonavir and corticosteroids had lower 21 day ARDS and mortality than those who received ribavirin and corticosteroids.<sup>89,90</sup> However, all studies were determined by a systematic review to be inconclusive due to selection and treatment biases.<sup>91</sup> Two case reports from Greece<sup>76</sup> and Korea<sup>78</sup> showed positive outcomes with lopinavir/ritonavir, type 1 IFN and ribavirin combination therapy. The Greek patient cleared viraemia 2 days after initiation of triple therapy administered on day 13 of illness.

## **Ribavirin**

### **In vitro and animal studies**

Ribavirin has a broad spectrum of activity against viral infections.<sup>92,93</sup> In SARS-CoV, four of six *in vitro* studies found an antiviral effect.<sup>14,64,89,94–96</sup> However, no virological effects of ribavirin were found in SARS-CoV animal models when used as monotherapy.<sup>97,98</sup> A mouse model even showed that ribavirin may prolong or enhance viral replication in the lungs.<sup>99</sup> Similarly in MERS-CoV, ribavirin is inhibitory but only at very high concentrations in Vero cells. The 50% inhibitory concentration (IC<sub>50</sub>) of ribavirin was determined to be 41.45 µg/mL.<sup>70</sup> However, in humans, a level of only 24 µg/mL is achievable following a (high) 1000 mg intravenous dose.<sup>70</sup> Ribavirin monotherapy has not been studied in animal models for MERS-CoV.

### **Clinical data**

In a systematic review of SARS treatment, 20/24 studies were deemed inconclusive due to inconsistent reporting of outcomes, an inconsistent treatment regimen, no control group or a biased control group. The effect of ribavirin could not be distinguished from the effects of other therapies such as corticosteroids and other antivirals.<sup>91</sup> A single-centre RCT on SARS patients which compared ribavirin with IFN-1α showed no significant differences in days to symptom improvement and discharge.<sup>100</sup> Four

presented evidence of possible harm, including haemolytic anaemia, liver dysfunction and metabolic derangements.<sup>101–104</sup>

Synergy between ribavirin and IFN is discussed under the section on IFNs above.

## **Mycophenolic acid**

Similar to ribavirin, mycophenolic acid is an inhibitor of cellular inosine monophosphate dehydrogenase, and has antiviral activities against a number of viruses including influenza A.<sup>105</sup> Via the same mechanism, mycophenolic acid also inhibits purine nucleotide synthesis in lymphocytes.<sup>106</sup> This makes it a popular immunosuppressant in solid-organ transplants and autoimmune diseases such as systemic lupus erythematosus.

### **In vitro and animal studies**

Although mycophenolic acid has no *in vitro* or murine effect on SARS-CoV, it inhibits MERS-CoV at a concentration achievable by standard clinical oral dosing.<sup>13,107</sup> It displays synergy with IFN-β1b<sup>107</sup> and thiopurine analogues<sup>108</sup> *in vitro*. However, in common marmosets, mycophenolic acid-treated animals developed severe and/or fatal disease with higher mean viral loads (0.15–0.54 log<sub>10</sub> copies/glyceraldehyde 3-phosphate dehydrogenase;  $P < 0.05$ ) than untreated animals.<sup>73</sup> The mortality rate at 36 h post-inoculation of MERS CoV was 67% (untreated and mycophenolic acid-treated) versus 0%–33% (lopinavir/ritonavir-treated and IFN-β1b-treated).

### **Clinical data**

The use of mycophenolic acid monotherapy has not been reported in MERS. IFN-β and mycophenolic acid combination therapy was described in a retrospective observational study in Saudi Arabia involving 51 patients;<sup>3</sup> all of the 8 patients who received IFN-β and mycophenolic acid survived. However, this group of patients had lower Acute Physiology and Chronic Health Evaluation II (APACHEII) scores compared with the rest who received a variety of antiviral agents including ribavirin and IFN-α, steroids and antibiotics.

## **Cyclosporin A**

Cyclosporin and its derivatives inhibit the cellular peptidyl-prolyl isomerase activities of cyclophilins, which are important for the replication of viruses including HIV and hepatitis C virus.<sup>109–111</sup>

Non-immunosuppressive cyclosporin DEBIO-025 (alisporivir) was found to be highly potent in hepatitis C treatment with a IC<sub>50</sub> for inhibition in Huh 5–2 cells of 0.27±0.03 µg/mL, compared with cyclosporine A's IC<sub>50</sub> of 2.8±0.4 µg/mL.<sup>112</sup> It was also found that a combination of IFN-α2a with either cyclosporine A or DEBIO-025 resulted in additive to slightly synergistic antiviral activity.<sup>112</sup>

### **In vitro activity**

Low micromolar, non-cytotoxic concentrations of cyclosporin A strongly affected the replication of SARS-CoV and MERS-CoV in Vero and Huh7 cell cultures.<sup>13,67,113</sup> Cyclosporin rendered SARS-CoV



RNA and protein synthesis almost undetectable, suggesting an early block in replication.<sup>113</sup>

### Clinical data

There are no clinical data available on the efficacy of cyclosporin A in SARS or MERS. Cyclosporin A is readily available due to its use in solid-organ transplant patients and as therapy for autoimmune conditions such as rheumatoid arthritis and psoriasis. Its immune suppressive effect raises concern about the setting of infections, especially with a high  $EC_{50}/C_{max}$  ratio at standard therapeutic dosages.

### Chloroquine

Chloroquine is an antimalarial that sequesters protons in lysosomes to increase intracellular pH.

### In vitro and animal studies

Chloroquine is inhibitory *in vitro* for multiple viruses including influenza, dengue virus and MERS-CoV at a concentration achievable by standard clinical oral dosing.<sup>11,114–116</sup> However, it did not reduce viral replication in SARS-CoV infected mice, possibly because the cell surface pathway was not simultaneously blocked.<sup>62</sup>

### Clinical data

No clinical data are available on the efficacy of chloroquine on coronaviruses. Its use in seasonal prophylaxis for influenza was studied in a large RCT.<sup>117</sup> Chloroquine was well tolerated but failed to prevent disease.

### Nitazoxanide

Nitazoxanide is a potent type 1 IFN inducer that was originally developed as an antiprotozoal agent.<sup>118</sup> It is being repurposed as a broad-spectrum antiviral agent, and is undergoing development for the treatment of hepatitis C, influenza and other viral respiratory infections. In addition to its antiviral activity, nitazoxanide inhibits the production of pro-inflammatory cytokines in peripheral blood mononuclear cells.<sup>119</sup>

### In vitro activity

Nitazoxanide possesses potent antiviral activity against influenza viruses,<sup>120</sup> and is one of the top three inhibitors that demonstrated robust anti-coronavirus activities in a recent screen of the NIH Clinical Collection library.<sup>121</sup> It was shown to inhibit MERS CoV cultured in LLC-MK2 cells with an  $IC_{50}$  of 0.92  $\mu\text{g}/\text{mL}$ , similar to the levels observed for influenza and other viruses. This  $IC_{50}$  is achievable in humans following twice daily administration of nitazoxanide extended-release tablets: peak and trough plasma concentrations were reported to be 4.6 and 0.8  $\mu\text{g}/\text{mL}$ , respectively.<sup>119</sup>

### Clinical data

There are no clinical data on the efficacy of nitazoxanide in SARS or MERS. There are two Phase 2 RCTs showing benefits in childhood

respiratory infections and uncomplicated influenza in adults, respectively.<sup>122,123</sup>

### Antibiotics

Broad-spectrum antibiotics are commonly used in the management of MERS for empirical treatment of severe community-acquired pneumonia, as well as ventilator-associated bacterial pneumonia. Teicoplanin, a glycopeptide antibiotic that inhibits bacterial cell wall synthesis, was recently found to have actions against MERS-CoV and Ebola virus.<sup>124</sup>

### In vitro

Teicoplanin was found to potently prevent the entry of MERS-CoV and SARS-CoV pseudotyped viruses into host cellular cytoplasm. Furthermore, teicoplanin has an inhibitory effect on replication-competent virus-like particles, with a low  $IC_{50}$  of 330 nM.<sup>124</sup>

### In vivo

Teicoplanin is clinically effective in the treatment of Gram-positive bacterial infections including *Enterococcus faecalis*, *Staphylococcus aureus* and *Streptococcus viridans*. Further pharmacodynamics studies specific to MERS-CoV are required to discern its antiviral efficacy.

### Fusion inhibitors

#### In vitro and animal studies

Analogous to the mechanism of mAbs, antiviral peptides target various regions of S protein to prevent MERS-CoV entry into host cells. Camostat, a serine protease inhibitor with a good safety profile used to treat chronic pancreatitis in humans, suppresses MERS-CoV entry into human bronchial submucosal gland-derived Calu-3 cells by 10-fold and virus growth by 270-fold.<sup>125</sup> However, it was found not to be efficacious against MERS-CoV infection of derived cells from immature lung tissue. Another type of fusion inhibitor under *in vitro* study is the heptad repeat 2 peptide (HR2P), a synthesized peptide derived from the HR2 domain of MERS-CoV S protein. It specifically binds to the HR1 domain of the viral S protein and blocks MERS-CoV replication and its S protein-mediated cell–cell fusion.<sup>126</sup> Intranasal administration of HR2P-M2 effectively protected adenovirus serotype-5-human dipeptidyl peptidase 4-transduced mice from infection by MERS-CoV strains with or without mutations in the HR1 region of S protein, with >1000-fold reduction of viral titres in lung. The protection was enhanced by combining HR2P-M2 with IFN- $\beta$ .<sup>127</sup> Combining antiviral peptides targeting different regions of the S2 subunit of the S protein theoretically may overcome the risk of drug resistance.

### Clinical data

Investigations of fusion inhibitors for MERS remain preclinical. There are no clinical data on the efficacy of fusion inhibitors in SARS or MERS.

## Mannose-binding lectin

### *In vitro* activity

Mannose-binding lectin (MBL) is a key molecule in innate immunity, and functions as an ante-antibody before the specific antibody response. MBL inhibits viral binding via SARS-CoV S glycoprotein.<sup>128</sup> A retrospective case-control study on the serum of 569 SARS patients and 1188 control subjects showed a higher frequency of haplotypes associated with low or deficient levels of MBL in SARS patients than in control subjects.<sup>129</sup> MBL deficiency is therefore a possible susceptibility factor for acquisition of SARS.

### Clinical data

MBL remains an investigational therapy. There are no clinical data on the efficacy of MBL in SARS or MERS.

## Corticosteroids

Corticosteroids were widely used in SARS due to their anti-inflammatory effects.<sup>74,101,130-136</sup> Most of these cohorts were treated simultaneously with ribavirin. However, the potential local and systemic immunosuppression by corticosteroids is concerning.<sup>137,138</sup> One RCT concluded that the administration of corticosteroids might enhance viral replication in the lung, as shown by higher plasma SARS-CoV viral load and slower serum viral clearance in weeks 2-3 of illness in patients given hydrocortisone ( $n=10$ ) than in those given normal saline ( $n=7$ ) in the early phase of the disease.<sup>139</sup> There were similar findings when corticosteroids were tested in H1N1 influenza-affected patients.<sup>140</sup> A retrospective cohort study showed that the use of corticosteroids was associated with increased risks of prolonged lower respiratory tract viral replication, nosocomial infections, ventilator-associated pneumonia and higher mortality.<sup>140</sup> Many patients with severe MERS were treated with systemic high-dose corticosteroids, which were intended to reverse the progression of respiratory distress and to prevent lung fibrosis. This has not proven to be successful.<sup>141</sup> Corticosteroids do not improve longer-term outcomes in ARDS and their routine use is not recommended.<sup>142</sup> In addition, corticosteroids were also associated with osteonecrosis, delirium and aspergillosis.<sup>143-146</sup>

## Discussion

It is challenging to select appropriate pharmacological treatments when faced with a novel infection and inconclusive data drawn from many sources. Despite discovering a fairly large number of repurposed drugs that have activities against MERS-CoV, few have fulfilled their potential in clinical settings. Most of these agents have drawbacks, either in having high  $EC_{50}/C_{max}$  ratios at clinical dosages or immunosuppressive side effects, which discouraged further clinical trials. The sporadic epidemiology has also made patient recruitment into clinical trials difficult. The use of any therapeutics in MERS-CoV remains investigational. Data extrapolated from use in SARS, either *in vitro* or clinically, are, at best, of speculative value.

Convalescent plasma, IFN with or without ribavirin, and lopinavir/ritonavir are most likely to be beneficial and should be further evaluated. There are retrospective and non-randomized interventional

data obtained during the SARS and H1N1 outbreaks showing that convalescent plasma brought about a rapid decrease in viraemia and reduced mortality.<sup>18,43-51</sup> Treatment with convalescent plasma is likely to be more effective when there is significant viraemia, hence early administration is key.<sup>51,52</sup> A prospective human study investigating the use of convalescent plasma in MERS is ongoing, but is facing logistical and recruitment challenges. Plasma products and immunoglobulins vary geographically and will likewise vary in efficacy against MERS.<sup>55-57</sup> Given the small number of MERS patients and the significant mortality of this infection, there may not be sufficient convalescent sera for this to be a scalable option, particularly outside of the Middle East. Cross-reactivity between SARS-CoV and MERS-CoV antibodies has been observed but is unlikely to be useful therapeutically.<sup>22</sup> mAbs could offer a useful alternative as they are rapidly reproducible and have so far shown high potency and specificity. However, further development is likely to be tempered by the challenges of licensing and full-scale production at affordable costs for an undefined population.

IFN and ribavirin with or without lopinavir/ritonavir is the most reported therapy for MERS. Although non-human primate studies showed that combination treatment of IFN with ribavirin and/or lopinavir resulted in reduced virus replication, moderated host response and improved clinical outcome,<sup>72,73</sup> five small-scale retrospective studies in critically ill patients failed to show mortality benefits.<sup>80-84</sup> This discrepancy between *in vitro* and *in vivo* findings may be related to the high  $EC_{50}/C_{max}$  ratios of these drugs and delays in drug administration.<sup>13,70</sup> Early drug administration is essential in MERS patients as they have a more rapid progression to death than SARS patients.<sup>147</sup> Ribavirin should be used with caution as *in vitro* studies for MERS-CoV required a high serum concentration for inhibition.<sup>70,72</sup> The dose of ribavirin can be reduced when used together with IFN- $\alpha 2b$ <sup>70</sup> but it is associated with multiple side effects including haemolysis, electrolyte imbalances and liver impairment, which can occur in up to 61% of treated patients.<sup>102</sup> Lopinavir has been shown in limited observational studies to result in lower mortality and less progression to ARDS in SARS.<sup>89,90</sup> Its use has been reported in one MERS patient, who cleared viraemia 2 days after administration of lopinavir/ritonavir, ribavirin and IFN- $\alpha 2a$ .<sup>76</sup> Some have suggested that antiviral administration should be considered as soon as possible after diagnosis<sup>148</sup> based on limited clinical evidence that earlier administration of IFN and ribavirin resulted in a trend towards improved survival in MERS.<sup>83</sup> Similarly in SARS, therapeutic benefit was observed when ribavirin was given earlier than 6-14 days after the onset of symptoms.<sup>91,149</sup>

Corticosteroids, ribavirin monotherapy and mycophenolic acid are likely to cause more harm than benefit. Corticosteroids cause local and systemic immunosuppression. Their administration has been associated with higher plasma viral load, slower viral clearance and higher mortality in both SARS and H1N1.<sup>138,139</sup> Furthermore, they have not been shown to improve longer-term outcomes in ARDS.<sup>142</sup> Ribavirin should not be considered for use as a monotherapy due to its poor side effect profile and the high dosage required to inhibit MERS-CoV.<sup>70,72</sup> It has not been shown to be effective in MERS. In SARS, most of the clinical evidence on ribavirin was deemed inconclusive.<sup>91</sup> There are no clinical data on the efficacy of mycophenolic acid in SARS or MERS. However, it led to severe and/or fatal disease with higher mean viral loads in an animal model.<sup>73</sup>

While animal to human transmission of MERS CoV continues in the Middle East, it is likely that infected individuals will continue to export the illness to countries with minimal or no experience of dealing with it. Understanding the value and risks of the many treatment options is needed when urgently selecting a therapeutic regimen, especially during what will necessarily be a stressful and 'public' period for any host country and institution. The medical team will need to make decisions based on the body of available information, which gives anything but clear direction. Treatments will need to be applied adhering to research treatment protocols and systematic data collection. Meanwhile, as clinical researchers we simply must improve our ability to undertake multicentre, multinational RCTs in outbreak settings, particularly for emerging pathogens.

## Transparency declarations

None to declare.

## References

- WHO. Middle East Respiratory Syndrome Coronavirus (MERS-CoV): MERS-CoV in Republic Korea at a Glance. [http://www.wpro.who.int/outbreaks\\_emergencies/wpro\\_coronavirus/en](http://www.wpro.who.int/outbreaks_emergencies/wpro_coronavirus/en).
- Zumla A, Chan JF, Azhar EI *et al*. Coronaviruses—drug discovery and therapeutic options. *Nat Rev Drug Discov* 2016; **15**: 327–47.
- Al Ghamdi M, Alghamdi KM, Ghandoori Y *et al*. Treatment outcomes for patients with Middle Eastern Respiratory Syndrome Coronavirus (MERS CoV) infection at a coronavirus referral center in the Kingdom of Saudi Arabia. *BMC Infect Dis* 2016; **16**: 174.
- Song W, Wang Y, Wang N *et al*. Identification of residues on human receptor DPP4 critical for MERS-CoV binding and entry. *Virology* 2014; **471–473**: 49–53.
- Raj VS, Mou H, Smits SL *et al*. Dipeptidyl peptidase 4 is a functional receptor for the emerging human coronavirus-EMC. *Nature* 2013; **495**: 251–4.
- Chan RWY, Chan MCW, Agnihothram S *et al*. Tropism of and innate immune responses to the novel human betacoronavirus lineage C virus in human ex vivo respiratory organ cultures. *J Virol* 2013; **87**: 6604–14.
- Jie Zhou, Hin Chu, Cun Li *et al*. Active replication of Middle East Respiratory Syndrome coronavirus and aberrant induction of inflammatory cytokines and chemokines in human macrophages: implications for pathogenesis. *J Infect Dis* 2014; **209**: 1331–42.
- Eckerle I, Muller M, Kallies S *et al*. In-vitro renal epithelial cell infection reveals a viral kidney tropism as a potential mechanism for acute renal failure during Middle East respiratory syndrome (MERS) coronavirus infection. *Viral J* 2013; **10**: 359.
- Kindler E, Jonsdottir HR, Muth D *et al*. Efficient replication of the novel human betacoronavirus EMC on primary human epithelium highlights its zoonotic potential. *MBio* 2013; **4**: e00611–12.
- Zielecki F, Weber M, Eickmann M *et al*. Human cell tropism and innate immune system interactions of human respiratory coronavirus EMC compared to those of severe acute respiratory syndrome coronavirus. *J Virol* 2013; **87**: 5300–4.
- de Wilde AH, Jochmans D, Posthuma CC *et al*. Screening of an FDA-approved compound library identifies four small-molecule inhibitors of Middle East respiratory syndrome coronavirus replication in cell culture. *Antimicrob Agents Chemother* 2014; **58**: 4875–84.
- Dyall J, Coleman CM, Hart BJ *et al*. Repurposing of clinically developed drugs for treatment of Middle East respiratory syndrome coronavirus infection. *Antimicrob Agents Chemother* 2014; **58**: 4885–93.
- Chan JF, Chan K-H, Kao RY *et al*. Broad-spectrum antivirals for the emerging Middle East respiratory syndrome coronavirus. *J Infect* 2013; **67**: 606–16.
- Chen F, Chan KH, Jiang Y *et al*. In vitro susceptibility of 10 clinical isolates of SARS coronavirus to selected antiviral compounds. *J Clin Virol* 2004; **31**: 69–75.
- Amoss HL, Chesney AM. A report on the serum treatment of twenty-six cases of epidemic poliomyelitis. *J Exp Med* 1917; **25**: 581–608.
- McGuire LW, Redden WR. The use of convalescent human serum in influenza pneumonia: a preliminary report. *Am J Public Health* 1918; **8**: 741–4.
- Mupapa K, Massamba M, Kibadi K *et al*. Treatment of ebola hemorrhagic fever with blood transfusions from convalescent patients. *J Infect Dis* 1999; **179** Suppl 1: S18–23.
- Cheng Y, Wong R, Soo YO *et al*. Use of convalescent plasma therapy in SARS patients in Hong Kong. *Eur J Clin Microbiol Infect Dis* 2005; **24**: 44–6.
- WHO. WHO–International Severe Acute Respiratory and Emerging Infection Consortium (ISARIC) MERS-CoV Outbreak Readiness Workshop 2013. [http://www.who.int/csr/disease/coronavirus\\_infections/MERS\\_outbreak\\_readiness\\_workshop.pdf](http://www.who.int/csr/disease/coronavirus_infections/MERS_outbreak_readiness_workshop.pdf).
- WHO. Blood Regulators Network (BRN) Position Paper on Collection and Use of Convalescent Plasma or Serum as an Element in Middle East Respiratory Syndrome Coronavirus Response. [http://www.who.int/bloodproducts/brn/BRN\\_PositionPaperConvPlasmaMERSCoV\\_March2014.pdf](http://www.who.int/bloodproducts/brn/BRN_PositionPaperConvPlasmaMERSCoV_March2014.pdf).
- Zhao J, Perera RA, Kayali G *et al*. Passive immunotherapy with dromedary immune serum in an experimental animal model for Middle East Respiratory Syndrome coronavirus infection. *J Virol* 2015; **89**: 6117–20.
- Chan KH, Chan JF, Tse H *et al*. Cross-reactive antibodies in convalescent SARS patients' sera against the emerging novel human coronavirus EMC (2012) by both immunofluorescent and neutralizing antibody tests. *J Infect* 2013; **67**: 130–40.
- Du L, Kou Z, Ma C *et al*. A truncated receptor-binding domain of MERS-CoV spike protein potently inhibits MERS-CoV infection and induces strong neutralizing antibody responses: implication for developing therapeutics and vaccines. *PLoS ONE* 2013; **8**: e81587.
- Ohnuma K, Haagmans BL, Hatano R *et al*. Inhibition of Middle East Respiratory Syndrome coronavirus infection by anti-CD26 monoclonal antibody. *J Virol* 2013; **87**: 13892–9.
- Ying T, Li H, Lu L *et al*. Development of human neutralizing monoclonal antibodies for prevention and therapy of MERS-CoV infections. *Microbes Infect* 2015; **17**: 142–8.
- Sakamoto S, Tanaka H, Morimoto S. Towards the prophylactic and therapeutic use of human neutralizing monoclonal antibodies for Middle East respiratory syndrome coronavirus (MERS-CoV). *Ann Transl Med* 2015; **3**: 35.
- Luke T, Wu H, Zhao J *et al*. Human polyclonal immunoglobulin G from transchromosomal bovines inhibits MERS-CoV in vivo. *Sci Transl Med* 2016; **8**: 326ra21.
- Pascal KE, Coleman CM, Mujica AO *et al*. Pre- and postexposure efficacy of fully human antibodies against Spike protein in a novel humanized mouse model of MERS-CoV infection. *PNAS* 2015; **112**: 8738–43.
- Du L, Zhao G, Yang Y *et al*. A conformation-dependent neutralizing monoclonal antibody specifically targeting receptor-binding domain in MERS-CoV spike protein. *J Virol* 2014; **88**: 7045–53.

- 30 Li Y, Wan Y, Liu P *et al.* A humanized neutralizing antibody against MERS-CoV targeting the receptor-binding domain of the spike protein. *Cell Res* 2015; **25**: 1237–49.
- 31 Yu X, Zhang S, Jiang L *et al.* Structural basis for the neutralization of MERS-CoV by a human monoclonal antibody MERS-27. *Scientific Reports* 2015; **5**: 13133.
- 32 Mou H, Raj VS, van Kuppeveld FJ *et al.* The receptor binding domain of the new Middle East Respiratory Syndrome coronavirus maps to a 231-residue region in the spike protein that efficiently elicits neutralizing antibodies. *J Virol* 2013; **87**: 9379–83.
- 33 Tang XC, Agnihotram SS, Jiao Y *et al.* Identification of human neutralizing antibodies against MERS-CoV and their role in virus adaptive evolution. *Proc Natl Acad Sci USA* 2014; **111**: E2018–26.
- 34 Ying T, Du L, Ju TW *et al.* Exceptionally potent neutralization of Middle East Respiratory Syndrome coronavirus by human monoclonal antibodies. *J Virol* 2014; **88**: 7796–805.
- 35 Jiang L, Wang N, Zuo T *et al.* Potent neutralization of MERS-CoV by human neutralizing monoclonal antibodies to the viral spike glycoprotein. *Sci Transl Med* 2014; **6**: 234ra59.
- 36 Johnson RF, Bagci U, Keith L *et al.* 3B11-N, a monoclonal antibody against MERS-CoV, reduces lung pathology in rhesus monkeys following intratracheal inoculation of MERS-CoV Jordan-n3/2012. *Virology* 2016; **490**: 49–58.
- 37 Corti D, Zhao J, Pedotti M *et al.* Prophylactic and postexposure efficacy of a potent human monoclonal antibody against MERS coronavirus. *Proc Natl Acad Sci USA* 2015; **112**: 10473–8.
- 38 Corti D, Passini N, Lanzavecchia A *et al.* Rapid generation of a human monoclonal antibody to combat Middle East respiratory syndrome. *J Infect Public Health* 2016; **9**: 231–5.
- 39 Arabi YM, Arifi AA, Balkhy HH *et al.* Clinical course and outcomes of critically ill patients with Middle East Respiratory Syndrome coronavirus infection. *Ann Intern Med* 2014; **160**: 389–97.
- 40 Kapoor M, Pringle K, Kumar A *et al.* Clinical and laboratory findings of the first imported case of Middle East Respiratory Syndrome coronavirus to the United States. *Clin Infect Dis* 2014; **59**: 1511–8.
- 41 Arabi Y, Balkhy H, Hajeer AH *et al.* Feasibility, safety, clinical, and laboratory effects of convalescent plasma therapy for patients with Middle East respiratory syndrome coronavirus infection: a study protocol. *Springerplus* 2015; **4**: 709.
- 42 Yaseen M Arabi. *Anti-MERS-COV Convalescent Plasma Therapy NCT02190799*. <https://clinicaltrials.gov/ct2/show/NCT02190799>.
- 43 Modjarrad K. Treatment strategies for Middle East respiratory syndrome coronavirus. *J Virus Erad* 2016; **2**: 1–4.
- 44 Yeh KM, Chiueh TS, Siu LK *et al.* Experience of using convalescent plasma for severe acute respiratory syndrome among healthcare workers in a Taiwan hospital. *J Antimicrob Chemother* 2005; **56**: 919–22.
- 45 Wu W, Wang JF, Liu PM *et al.* Clinical features of 96 patients with severe acute respiratory syndrome from a hospital outbreak. *Zhonghua Nei Ke Za Zhi* 2003; **42**: 453–7.
- 46 Li ZZ, Shen KL, Wei XM *et al.* Clinical analysis of pediatric SARS cases in Beijing. *Zhonghua Er Ke Za Zhi* 2003; **41**: 574–7.
- 47 Soo YO, Cheng Y, Wong R *et al.* Retrospective comparison of convalescent plasma with continuing high-dose methylprednisolone treatment in SARS patients. *Clin Microbiol Infect* 2004; **10**: 676–8.
- 48 Ho JC, Wu AY, Lam B *et al.* Pentaglobin in steroid-resistant severe acute respiratory syndrome. *Int J Tuberc Lung Dis* 2004; **8**: 1173–9.
- 49 Hung IF, To KK, Lee CK *et al.* Convalescent plasma treatment reduced mortality in patients with severe pandemic influenza A (H1N1) 2009 virus infection. *Clin Infect Dis* 2011; **52**: 447–56.
- 50 Hung IN, To KW, Lee C *et al.* Hyperimmune intravenous immunoglobulin treatment: a multi-centre double-blind randomized controlled trial for patients with severe A(H1N1) infection. *Chest* 2013; **144**: 464–73.
- 51 Mair-Jenkins J, Saavedra-Campos M, Baillie JK *et al.* The effectiveness of convalescent plasma and hyperimmune immunoglobulin for the treatment of severe acute respiratory infections of viral etiology: a systematic review and exploratory meta-analysis. *J Infect Dis* 2015; **211**: 80–90.
- 52 Weingartl H, Czub M, Czub S *et al.* Immunization with modified vaccinia virus Ankara-based recombinant vaccine against severe acute respiratory syndrome is associated with enhanced hepatitis in ferrets. *J Virol* 2004; **78**: 12672–6.
- 53 Clay C, Donart N, Fomukong N *et al.* Primary Severe Acute Respiratory Syndrome coronavirus infection limits replication but not lung inflammation upon homologous rechallenge. *J Virol* 2012; **86**: 8 4234–44.
- 54 Public Health England. *Treatment of MERS-CoV: Information for Clinicians. Clinical Decision Making Support for Treatment of MERS-CoV Patients v3.0 2015*. [https://www.gov.uk/government/uploads/system/uploads/attachment\\_data/file/459835/merscov\\_for\\_clinicians\\_sept2015.pdf](https://www.gov.uk/government/uploads/system/uploads/attachment_data/file/459835/merscov_for_clinicians_sept2015.pdf).
- 55 Müller MA, Meyer B, Corman VM *et al.* Presence of Middle East respiratory syndrome coronavirus antibodies in Saudi Arabia: a nationwide, cross-sectional, serological study. *Lancet Infect Dis* 2015; **15**: 559–64.
- 56 Gierer S, Hofmann-Winkler H, Albuali WH *et al.* Lack of MERS coronavirus neutralizing antibodies in humans, eastern province, Saudi Arabia. *Emerging Infect Dis* 2013; **19**: 2034–6.
- 57 Aburizaiza AS, Mattes FM, Azhar EI *et al.* Investigation of anti-Middle East respiratory syndrome antibodies in blood donors and slaughterhouse workers in Jeddah and Makkah, Saudi Arabia, fall 2012. *J Infect Dis* 2014; **209**: 243–6.
- 58 Lau SK, Lau CC, Chan KH *et al.* Delayed induction of proinflammatory cytokines and suppression of innate antiviral response by the novel Middle East respiratory syndrome coronavirus: implications for pathogenesis and treatment. *J Gen Virol* 2013; **94**: 2679–90.
- 59 Josset L, Menachery VD, Gralinski LE *et al.* Cell host response to infection with novel human coronavirus EMC predicts potential antivirals and important differences with SARS coronavirus. *mBio* 2013; **4**: e00165–13.
- 60 Haagmans BL, Kuiken T, Martina BE *et al.* Pegylated interferon- $\alpha$  protects type 1 pneumocytes against SARS coronavirus infection in macaques. *Nat Med* 2004; **10**: 290–3.
- 61 Sainz B Jr, Mossel EC, Peters CJ *et al.* Interferon-beta and interferon-gamma synergistically inhibit the replication of severe acute respiratory syndrome-associated coronavirus (SARS-CoV). *Virology* 2004; **329**: 11–7.
- 62 Barnard DL, Day CW, Bailey K *et al.* Evaluation of immunomodulators, interferons and known in vitro SARS-coV inhibitors for inhibition of SARS-coV replication in BALB/c mice. *Antivir Chem Chemother* 2006; **17**: 275–84.
- 63 Cervantes-Barragan L, Zust R, Weber F *et al.* Control of coronavirus infection through plasmacytoid dendritic-cell-derived type I interferon. *Blood* 2007; **109**: 1131–7.
- 64 Ströher U, DiCaro A, Li Y *et al.* Severe acute respiratory syndrome-related coronavirus is inhibited by interferon- $\alpha$ . *J Infect Dis* 2004; **189**: 1164–7.
- 65 Hensley LE, Fritz EA, Jahrling PB *et al.* Interferon- $\beta$  1a and SARS coronavirus replication. *Emerging Infect Dis* 2004; **10**: 317–9.
- 66 Cinatl J, Morgenstern B, Bauer G *et al.* Treatment of SARS with human interferons. *Lancet* 2003; **362**: 293–4.
- 67 de Wilde AH, Raj VS, Oudshoorn D *et al.* MERS-coronavirus replication induces severe in vitro cytopathology and is strongly inhibited by cyclosporin A or interferon- $\alpha$  treatment. *J Gen Virol* 2013; **94**: 1749–60.



- 68 Haagmans BL, Osterhaus AD. Coronaviruses and their therapy. *Antiviral Res* 2006; **71**: 397–403.
- 69 Scagnolari C, Vicenzi E, Bellomi F *et al.* Increased sensitivity of SARS-coronavirus to a combination of human type I and type II interferons. *Antivir Ther* 2004; **9**: 1003–11.
- 70 Falzarano D, de Wit E, Martellaro C *et al.* Inhibition of novel  $\beta$  coronavirus replication by a combination of interferon- $\alpha$ 2b and ribavirin. *Sci Rep* 2013; **3**: 1686.
- 71 Zheng Y, Wang QY. Bioinformatics analysis on molecular mechanism of ribavirin and interferon- $\alpha$  in treating MERS-CoV. *Zhonghua Liu Xing Bing Xue Za Zhi* 2016; **37**: 291–3.
- 72 Falzarano D, de Wit E, Rasmussen AL *et al.* Interferon- $\alpha$ 2b and ribavirin treatment improve outcome in MERS-CoV-infected rhesus macaques. *Nature Med* 2013; **19**: 1313–7.
- 73 Chan JF, Yao Y, Yeung ML *et al.* Treatment with lopinavir/ritonavir or interferon- $\beta$ 1b improves outcome of MERS-CoV infection in a nonhuman primate model of common marmoset. *J Infect Dis* 2015; **212**: 1904–13.
- 74 Loutfy MR, Blatt LM, Siminovitch KA *et al.* Interferon alfacon-1 plus corticosteroids in Severe Acute Respiratory Syndrome: a preliminary study. *JAMA* 2003; **290**: 3222–8.
- 75 Faure E, Poissy J, Goffard A *et al.* Distinct immune response in two MERS-CoV-infected patients: can we go from bench to bedside? *PLoS ONE* 2014; **9**: e88716.
- 76 Spanakis N, Tsiodras S, Haagmans BL *et al.* Virological and serological analysis of a recent Middle East respiratory syndrome coronavirus infection case on a triple combination antiviral regimen. *Int J Antimicrob Agents* 2014; **44**: 528–32.
- 77 Khalid M, Al Rabiah F, Khan B *et al.* Ribavirin and interferon (IFN)-alpha-2b as primary and preventive treatment for Middle East respiratory syndrome coronavirus (MERS-CoV): a preliminary report of two cases. *Antivir Ther* 2015; **20**: 87–91.
- 78 Kim UJ, Won EJ, Kee SJ *et al.* Combination therapy with lopinavir/ritonavir, ribavirin and interferon-alpha for Middle East respiratory syndrome: a case report. *Antivir Ther* 2015: doi:10.3851/IMP3002.
- 79 Malik A, El Masry KM, Ravi M *et al.* Middle East Respiratory Syndrome Coronavirus during pregnancy, Abu Dhabi, United Arab Emirates, 2013. *Emerg Infect Dis* 2016; **22**: 515–7.
- 80 Khalid M, Khan B, Al Rabiah F *et al.* Middle Eastern Respiratory Syndrome Corona Virus (MERS CoV): case reports from a tertiary care hospital in Saudi Arabia. *Ann Saudi Med* 2014; **34**: 396–400.
- 81 Omrani AS, Saad MM, Baig K *et al.* Ribavirin and interferon alfa-2a for severe Middle East respiratory syndrome coronavirus infection: a retrospective cohort study. *Lancet Infect Dis* 2014; **4**: 1090–5.
- 82 Shalhoub S, Farahat F, Al-Jiffri A *et al.* IFN- $\alpha$ 2a or IFN- $\beta$ 1a in combination with ribavirin to treat Middle East respiratory syndrome coronavirus pneumonia: a retrospective study. *J Antimicrob Chemother* 2015; **70**: 2129–32.
- 83 Al-Tawfiq JA, Momattin H, Dib J *et al.* Ribavirin and interferon therapy in patient infected with the Middle East respiratory syndrome coronavirus: an observational study. *Int J Infect Dis* 2014; **20**: 42–6.
- 84 Khalid I, Alraddadi BM, Dairi Y *et al.* Acute management and long-term survival among subjects with severe Middle East Respiratory Syndrome coronavirus pneumonia and ARDS. *Respir Care* 2016; **61**: 3340–8.
- 85 WHO. *Middle East Respiratory Syndrome Coronavirus (MERS-CoV) Fact Sheet No. 401 June 2015*. <http://www.who.int/mediacentre/factsheets/mers-cov/en/>.
- 86 Djukanović R, Harrison T, Johnston SL *et al.* The effect of inhaled IFN- $\beta$  on worsening of asthma symptoms caused by viral infections. a randomized trial. *Am J Respir Crit Care Med* 2014; **190**: 145–54.
- 87 Wu CY, Jan JT, Ma SH *et al.* Small molecules targeting severe acute respiratory syndrome human coronavirus. *Proc Natl Acad Sci USA* 2004; **101**: 10012–7.
- 88 Lopez Aspiroz E, Santos Buelga D, Cabrera Figueroa S *et al.* Population pharmacokinetics of lopinavir/ritonavir (Kaletra) in HIV-infected patients. *Ther Drug Monit* 2011; **33**: 573–82.
- 89 Chu C, Cheng V, Hung I *et al.* Role of lopinavir/ritonavir in the treatment of SARS: initial virological and clinical findings. *Thorax* 2004; **59**: 252–6.
- 90 Chan KS, Lai ST, Chu CM *et al.* Treatment of severe acute respiratory syndrome with lopinavir/ritonavir: a multicentre retrospective matched cohort study. *Hong Kong Med J* 2003; **9**: 399–406.
- 91 Stockman LJ, Bellamy R, Garner P. SARS: systematic review of treatment effects. *PLoS Medicine* 2006; **3**: e343.
- 92 Snell NJ. Ribavirin—current status of a broad spectrum antiviral agent. *Expert Opin Pharmacother* 2001; **2**: 1317–24.
- 93 Crotty S, Maag D, Arnold JJ *et al.* The broad-spectrum antiviral ribonucleoside ribavirin is an RNA virus mutagen. *Nat Med* 2000; **6**: 1375–9.
- 94 Morgenstern B, Michaelis M, Baer PC *et al.* Ribavirin and interferon-beta synergistically inhibit SARS-associated coronavirus replication in animal and human cell lines. *Biochem Biophys Res Commun* 2005; **326**: 905–8.
- 95 Tan EL, Ooi EE, Lin CY *et al.* Inhibition of SARS coronavirus infection in vitro with clinically approved antiviral drugs. *Emerg Infect Dis* 2004; **10**: 581–6.
- 96 Cinatl J, Morgenstern B, Bauer G *et al.* Glycyrrhizin, an active component of liquorice roots, and replication of SARS-associated coronavirus. *Lancet* 2003; **361**: 2045–6.
- 97 Health Canada. *Clinical Information – Management of Severe Acute Respiratory Syndrome (SARS) in Adults: Interim Guidance for Health Care Providers*. <https://www.hpsc.ie/A-Z/Respiratory/SARS/HealthcareProfessionals/File631,en.pdf>.
- 98 US Army Medical Research Institute of Infectious Diseases, personal communication. *Severe Acute Respiratory Syndrome (SARS) and Coronavirus Testing, MMWR* 2003. <http://www.cdc.gov/mmwr/preview/mmwrhtml/mm5214a1.htm>.
- 99 Barnard DL, Day CW, Bailey K *et al.* Enhancement of the infectivity of SARS-CoV in BALB/c mice by IMP dehydrogenase inhibitors, including ribavirin. *Antiviral Res* 2006; **71**: 53–63.
- 100 Zhao Z, Zhang F, Xu M *et al.* Description and clinical treatment of an early outbreak of severe acute respiratory syndrome (SARS) in Guangzhou, PR China. *J Med Microbiol* 2003; **52**: 715–20.
- 101 Sung J, Wu A, Joynt G *et al.* Severe acute respiratory syndrome: report of treatment and outcome after a major outbreak. *Thorax* 2004; **59**: 414–20.
- 102 Knowles SR, Phillips EJ, Dresser L *et al.* Common adverse events associated with the use of ribavirin for severe acute respiratory syndrome in Canada. *Clin Infect Dis* 2003; **37**: 1139–42.
- 103 Booth CM, Matukas LM, Tomlinson GA *et al.* Clinical features and short-term outcomes of 144 patients with SARS in the greater Toronto area. *JAMA* 2003; **289**: 2801–9.
- 104 Wong WM, Ho JC, Ooi GC *et al.* Temporal patterns of hepatic dysfunction and disease severity in patients with SARS. *JAMA* 2003; **290**: 2663–5.
- 105 Markland W, McQuaid TJ, Jain J *et al.* Broad-spectrum antiviral activity of the IMP dehydrogenase inhibitor VX-497: a comparison with ribavirin and demonstration of antiviral additivity with alpha interferon. *Antimicrobial Agents Chemother* 2000; **44**: 859–66.
- 106 Allison A, Eugui E. Immunosuppressive and other effects of mycophenolic acid and an ester prodrug, mycophenolate mofetil. *Immunol Rev* 1993; **136**: 5–28.

- 107** Hart BJ, Dyall J, Postnikova E *et al.* Interferon- $\beta$  and mycophenolic acid are potent inhibitors of Middle East respiratory syndrome coronavirus in cell-based assays. *J Gen Virol* 2014; **95**: 571–7.
- 108** Cheng KW, Cheng SC, Chen WY *et al.* Thiopurine analogs and mycophenolic acid synergistically inhibit the papain-like protease of Middle East respiratory syndrome coronavirus. *Antiviral Res* 2015; **115**: 9–16.
- 109** Luban J, Bossolt KL, Franke EK *et al.* Human immunodeficiency virus type 1 Gag protein binds to cyclophilins A and B. *Cell* 1993; **73**: 1067–78.
- 110** Watashi K, Ishii N, Hijikata M *et al.* Cyclophilin B is a functional regulator of hepatitis C virus RNA polymerase. *Mol Cell* 2005; **19**: 111–22.
- 111** Yang F, Robotham JM, Nelson HB *et al.* Cyclophilin A is an essential cofactor for hepatitis C virus infection and the principal mediator of cyclosporine resistance in vitro. *J Virol* 2008; **82**: 5269–78.
- 112** Paeshuyse J, Kaul A, De Clercq E *et al.* The non-immunosuppressive cyclosporin DEBIO-025 is a potent inhibitor of hepatitis C virus replication in vitro. *Hepatology* 2006; **43**: 761–70.
- 113** de Wilde AH, Zevenhoven-Dobbe JC, van der Meer Y *et al.* Cyclosporin A inhibits the replication of diverse coronaviruses. *J Gen Virol* 2011; **92**: 2542–8.
- 114** Ooi EE, Chew JSW, Loh JP *et al.* In vitro inhibition of human influenza A virus replication by chloroquine. *Virology J* 2006; **3**: 39.
- 115** Keyaerts E, Vijgen L, Maes P *et al.* In vitro inhibition of severe acute respiratory syndrome coronavirus by chloroquine. *Biochem Biophys Res Commun* 2004; **323**: 264–8.
- 116** Vincent MJ, Bergeron E, Benjannet S *et al.* Chloroquine is a potent inhibitor of SARS coronavirus infection and spread. *Virology J* 2005; **2**: 69.
- 117** Paton NI, Lee L, Xu Y *et al.* Chloroquine for influenza prevention: a randomised, double-blind, placebo controlled trial. *Lancet Infect Dis* 2011; **11**: 677–83.
- 118** Rossignol JF. Nitazoxanide: a first-in-class broad-spectrum antiviral agent. *Antivir Res* 2014; **110**: 94–103.
- 119** Rossignol JF. Nitazoxanide, a new drug candidate for the treatment of Middle East respiratory syndrome coronavirus. *J Infect Public Health* 2016; **9**: 227–30.
- 120** Belardo G, La Frazia S, Cenciarelli O *et al.* Nitazoxanide, a novel potential anti-influenza drug, acting in synergism with neuraminidase inhibitors. In: *Abstracts of the Forty-ninth Annual Meeting of the Infectious Diseases Society of America, Boston, MA, 2011*. Abstract 1181. Infectious Diseases Society of America, Arlington, VA, USA.
- 121** Cao J, Forrest JC, Zhang X. A screen of the NIH Clinical Collection small molecule library identifies potential anti-coronavirus drugs. *Antiviral Res* 2015; **114**: 1–10.
- 122** Haffizulla J, Hartman A, Hoppers M *et al.* Effect of nitazoxanide in adults and adolescents with acute uncomplicated influenza: a double-blind, randomised, placebo-controlled, phase 2b/3 trial. *Lancet Infect Dis* 2014; **14**: 609–18.
- 123** Rossignol JF, Samudrala S, Hoppers M *et al.* A randomized, double-blind, placebo controlled study of nitazoxanide in adults and adolescents with acute uncomplicated influenza. In: *Oral presentation of the Forty-ninth Annual Meeting of the Infectious Diseases Society of America, Boston, MA, 2011*. Infectious Diseases Society of America, Arlington, VA, USA.
- 124** Zhou N, Pan T, Zhang J *et al.* Glycopeptide antibiotics potently inhibit cathepsin L in the late endosome/lysosome and block the entry of Ebola virus, Middle East Respiratory Syndrome Coronavirus (MERS-CoV), and Severe Acute Respiratory Syndrome Coronavirus (SARS-CoV). *J Biol Chem* 2016; **291**: 9218–32.
- 125** Shirato K, Kawase M, Matsuyama S. Middle East Respiratory Syndrome Coronavirus infection mediated by the transmembrane serine protease TMPRSS2. *J Virology* 2013; **87**: 12552–61.
- 126** Lu L, Liu Q, Zhu Y *et al.* Structure-based discovery of Middle East respiratory syndrome coronavirus fusion inhibitor. *Nat Commun* 2014; **5**: 3067.
- 127** Channappanavar R, Lu L, Xia S *et al.* Protective effect of intranasal regimens containing peptidic Middle East Respiratory Syndrome Coronavirus fusion inhibitor against MERS-CoV infection. *J Infect Dis* 2015; **212**: 1894–903.
- 128** Zhou Y, Lu K, Pfeifferle S *et al.* A single asparagine-linked glycosylation site of the Severe Acute Respiratory Syndrome coronavirus spike glycoprotein facilitates inhibition by mannose-binding lectin through multiple mechanisms. *J Virology* 2010; **84**: 8753–64.
- 129** Ip WK, Chan KH, Law HK *et al.* Mannose-binding lectin in severe acute respiratory syndrome coronavirus infection. *J Infect Dis* 2005; **191**: 1697–704.
- 130** So LK, Lau AC, Yam LY *et al.* Development of a standard treatment protocol for severe acute respiratory syndrome. *Lancet* 2003; **361**: 1615–7.
- 131** Wang JT, Sheng WH, Fang CT *et al.* Clinical manifestations, laboratory findings, and treatment outcomes of SARS patients. *Emerg Infect Dis* 2004; **10**: 818–24.
- 132** Wu W, Wang J, Liu P *et al.* A hospital outbreak of severe acute respiratory syndrome in Guangzhou, China. *Chin Med J (Engl)* 2003; **116**: 811–8.
- 133** Gomersall CD, Joynt GM, Lam P *et al.* Short-term outcome of critically ill patients with severe acute respiratory syndrome. *Intensive Care Med* 2004; **30**: 381–7.
- 134** Ho JC, Ooi GC, Mok TY *et al.* High-dose pulse versus nonpulse corticosteroid regimens in severe acute respiratory syndrome. *Am J Respir Crit Care Med* 2003; **168**: 1449–56.
- 135** Peiris JSM, Lai ST, Poon LLM *et al.* Coronavirus as a possible cause of severe acute respiratory syndrome. *Lancet* 2003; **361**: 1319–25.
- 136** Ooi CG, Khong PL, Ho JC *et al.* Severe acute respiratory syndrome: radiographic evaluation and clinical outcome measures. *Radiology* 2003; **229**: 2500–6.
- 137** Jones BM, Esk MA, Peiris JSM *et al.* Prolonged disturbances of in vitro cytokine production in patients with severe acute respiratory syndrome (SARS) treated with ribavirin and steroids. *Clin Exp Immunol* 2004; **135**: 467–73.
- 138** Zhang X, Alekseev K, Jung K *et al.* Cytokine responses in porcine respiratory coronavirus-infected pigs treated with corticosteroids as a model for severe acute respiratory syndrome. *J Virol* 2008; **82**: 4420–8.
- 139** Lee N, Allen Chan KC, Hui DS *et al.* Effects of early corticosteroid treatment on plasma SARS-associated coronavirus RNA concentrations in adult patients. *J Clin Virol* 2004; **31**: 304–9.
- 140** Kim SH, Hong SB, Yun SC *et al.* Corticosteroid treatment in critically ill patients with pandemic influenza A/H1N1 2009 infection: analytic strategy using propensity scores. *Am J Respir Crit Care Med* 2011; **183**: 1207–14.
- 141** The WHO MERS-CoV Research Group. State of knowledge and data gaps of Middle East Respiratory Syndrome Coronavirus (MERS-CoV) in humans. *PLoS Curr* 2013; **12**: 5.
- 142** Ruan SY, Lin HH, Huang CT *et al.* Exploring the heterogeneity of effects of corticosteroids on acute respiratory distress syndrome: a systematic review and meta-analysis. *Crit Care* 2014; **18**: R63.
- 143** Griffith JF, Antonio GE, Kumta SM *et al.* Osteonecrosis of hip and knee in patients with severe acute respiratory syndrome treated with steroids. *Radiology* 2005; **235**: 168–75.
- 144** Hong N, Du XK. Avascular necrosis of bone in severe acute respiratory syndrome. *Clin Radiol* 2004; **59**: 602–8.
- 145** Lee DT, Wing YK, Leung HC *et al.* Factors associated with psychosis among patients with severe acute respiratory syndrome: a case-control study. *Clin Infect Dis* 2004; **39**: 1247–9.

**146** Wang H, Ding Y, Li X *et al.* Fatal aspergillosis in a patient with SARS who was treated with corticosteroids. *N Engl J Med* 2003; **349**: 507–8.

**147** Hui DS, Memish ZA, Zumla A. Severe acute respiratory syndrome vs. the Middle East respiratory syndrome. *Curr Opin Pulm Med* 2014; **20**: 233–41.

**148** Chong YP, Song JY, Seo YB *et al.* Antiviral treatment guidelines for Middle East Respiratory Syndrome. *Infect Chemother* 2015; **47**: 212–2.

**149** Peiris JSM, Chu CM, Cheng VCC *et al.* Clinical progression and viral load in a community outbreak of coronavirus-associated SARS pneumonia: a prospective study. *Lancet* 2003; **361**: 1767–2.
